# Supplementary material for: The Human Innate Immune Protein Calprotectin Elicits a Multimetal Starvation Response in Pseudomonas aeruginosa
Source: PubMed Central journal article supplement (PMC8557868; doi:10.1128/spectrum.00519-21), 2021-09-22
Supplement: spectrum.00519-21-s0003.pdf [file spectrum.00519-21-s0003.pdf]

1 **Supplementary Information for**

2 **The human innate immune protein calprotectin elicits a multi-metal starvation response**  
3 **in *Pseudomonas aeruginosa***

4  
5 Cassandra E. Nelson<sup>a\*</sup>, Weiland Huang<sup>a\*</sup>, Emily M. Zygiel<sup>b</sup>, Elizabeth M. Nolan<sup>b#</sup>, Maureen A.  
6 Kane<sup>a#</sup>, Amanda G. Oglesby<sup>ac#</sup>

7  
8 <sup>a</sup>Department of Pharmaceutical Sciences, School of Pharmacy, University of Maryland,  
9 Baltimore, Baltimore, Maryland, USA

10 <sup>b</sup>Department of Chemistry, Massachusetts Institute of Technology, Cambridge, MA, USA

11 <sup>c</sup>Department of Microbiology and Immunology, School of Medicine, University of Maryland,  
12 Baltimore, Baltimore, Maryland, USA

13  
14 \*Contributed equally to this work

15  
16 #Corresponding authors: Amanda Oglesby ([aoglesby@rx.umaryland.edu](mailto:aoglesby@rx.umaryland.edu)), Elizabeth Nolan  
17 ([lnolan@mit.edu](mailto:lnolan@mit.edu)), and Maureen Kane ([mkane@rx.umaryland.edu](mailto:mkane@rx.umaryland.edu))

19 **Table S1:** *Excel file of proteins significantly changed by CP, Fe-depletion, Zn-depletion, Mn-*  
 20 *depletion, and metal-depletion*

**Table S2 Network analysis of significantly changed proteins**

| Condition                              | Number of nodes <sup>1</sup> | Number of edges <sup>2</sup> | Expected number of edges <sup>3</sup> | PPI Enrichment p-value  |
|----------------------------------------|------------------------------|------------------------------|---------------------------------------|-------------------------|
| Upregulated by CP treatment            | 93                           | 328                          | 57                                    | < 1.0x10 <sup>-16</sup> |
| Downregulated by CP treatment          | 72                           | 86                           | 42                                    | < 1.21x10 <sup>-9</sup> |
| Upregulated by Mn depletion            | 29                           | 1                            | 3                                     | 0.93                    |
| Downregulated by Mn depletion          | 17                           | 2                            | 3                                     | 0.762                   |
| Upregulated by Mn depletion, 0.5 LFC   | 72* (1)                      | 27                           | 27                                    | 0.508                   |
| Downregulated by Mn depletion, 0.5 LFC | 50* (2)                      | 11                           | 16                                    | 0.908                   |
| Upregulated by Fe depletion            | 95* (1)                      | 370                          | 57                                    | < 1.0x10 <sup>-16</sup> |
| Downregulated by Fe depletion          | 122* (1)                     | 279                          | 134                                   | < 1.0x10 <sup>-16</sup> |
| Upregulated by Zn depletion            | 76* (1)                      | 83                           | 26                                    | < 1.0x10 <sup>-16</sup> |
| Downregulated by Zn depletion          | 43* (2)                      | 16                           | 13                                    | 0.249                   |
| Upregulated by metal depletion         | 112                          | 450                          | 77                                    | < 1.0x10 <sup>-16</sup> |
| Downregulated by metal depletion       | 190* (8)                     | 430                          | 237                                   | < 1.0x10 <sup>-16</sup> |

<sup>1</sup>Nodes are the proteins

<sup>2</sup>Edges are the interactions, based on known interactions from curated databases and experimental data, and predicted interactions from gene neighborhoods, gene fusions, and gene co-occurrence, from textmining, co-expression, and protein homology

<sup>3</sup>Expected edges are the number of interactions expected from a similar sample size of random genes from the genome

<sup>4</sup>PPI Enrichment p-value is the confidence the number of edges is due to biological connection versus random chance

\*PAO1 proteins, some conditions have proteins that are unique to PA14. STRING database version 10.5 only has PAO1 in database. Numbers in parentheses are the number of proteins unique to PA14

21

22 **Table S3:** *Excel file of the comparisons between CP and metal depletion regulons*

**Table S4 MBC of Polymyxin B after preculture with CP**

| Condition      | MBC Range (mg/L) | Geometric Mean (mg/L) |
|----------------|------------------|-----------------------|
| Metal-replete  | 8-32             | 16                    |
| Metal-depleted | 64-128           | 102                   |
| CP Treatment   | 32-128           | 64                    |
| Low Mg         | 32-64            | 51                    |

23

24

**Table S5 Components of metal-depleted chemically-defined medium (CDM)**

| <b>Salt</b>                                     | <b>Final Concentration (mM)</b> |
|-------------------------------------------------|---------------------------------|
| (NH <sub>4</sub> ) <sub>2</sub> SO <sub>4</sub> | 51.8                            |
| KH <sub>2</sub> PO <sub>4</sub>                 | 9.85                            |
| NaH <sub>2</sub> PO <sub>4</sub>                | 40.2                            |
| CaCl <sub>2</sub>                               | 0.0337                          |
| NaCl <sub>2</sub>                               | 0.0992                          |
| MgSO <sub>4</sub>                               | 2.05                            |
| <b>Amino Acid</b>                               | <b>Final Concentration (mM)</b> |
| L-Cysteine                                      | 1.98                            |
| L-Aspartic acid                                 | 18.0                            |
| L-Glutamic acid                                 | 16.3                            |
| L-Proline                                       | 20.8                            |
| L-Arginine                                      | 2.07                            |
| L-Glycine                                       | 32.0                            |
| L-Histidine                                     | 3.09                            |
| L-Lysine HCl                                    | 3.29                            |
| L-Serine                                        | 22.8                            |
| L-Valine                                        | 4.10                            |
| L-Tyrosine                                      | 0.993                           |
| L-Threonine                                     | 20.1                            |
| L-Alanine                                       | 26.9                            |
| L-Isoleucine                                    | 4.47                            |
| L-Phenylalanine                                 | 4.47                            |
| L-Tryptophan                                    | 0.294                           |
| L-Methionine                                    | 1.21                            |
| <b>Other</b>                                    | <b>Final Concentration (mM)</b> |
| D-Glucose                                       | 20.2                            |
| Thiamine HCl                                    | 0.00178                         |
| Nicotinic Acid                                  | 1.21                            |

25

26

**Table S6 Primers and probes used in this study**

| <b>Name</b>          | <b>Sequence (5' to 3')</b>         | <b>Reference</b> |
|----------------------|------------------------------------|------------------|
| 16S Forward          | GGTGGTTCAGCAAGTTGGATGTG            | (1)              |
| 16S Reverse          | CCAGGTGGTCGCCTTCGC                 | (1)              |
| <i>znuA</i> Forward  | GGCTCGACGGGAAACTC                  | (2)              |
| <i>znuA</i> Reverse  | CGTAGGCCTCCTCGAAATAG               | (2)              |
| <i>znuA</i> probe    | CG GCA AGC CTT TCT TCG TCT         | (2)              |
| <i>zur</i> Forward   | CGT CGGCTGCAACAA                   | This study       |
| <i>zur</i> Reverse   | ATGGCCCGGCTGATA                    | This study       |
| <i>zur</i> Probe     | CACCAGGGCCAGTTCCTCATCTG            | This study       |
| <i>lip2</i> Forward  | GTCAATCCCGACCTCAA                  | (3)              |
| <i>lip2</i> Reverse  | GTTTCGTAGAGGCTGAAGAA               | (3)              |
| <i>lip2</i> Probe    | AGTGCGGCTGTTTCGAGCTGAAA            | (3)              |
| <i>hsiB2</i> Forward | TGCCGTTGAAGCTACTG                  | (3)              |
| <i>hsiB2</i> Reverse | CGTCGAAGGTCATCTTGT                 | (3)              |
| <i>hsiB2</i> Probe   | CAAGGTGGAGGACCGCAAGCC              | (3)              |
| <i>clpV2</i> Forward |                                    | This study       |
| <i>clpV2</i> Reverse |                                    | This study       |
| <i>clpV2</i> Probe   |                                    | This study       |
| <i>xcpP</i> Forward  | CGC GGA CGA CAT TAC AA             | This study       |
| <i>xcpP</i> Reverse  | TCT TCG GCG GGT TCT                | This study       |
| <i>xcpP</i> Probe    | CGA TCG AAC AAC TGC AAA<br>GCC TGC | This study       |
| <i>xcpT</i> Forward  | CCA AGG GCG ACA TCA AG             | This study       |
| <i>xcpT</i> Reverse  | GGT AGC CGT CCT TGT TC             | This study       |
| <i>xcpT</i> Probe    | AAG CTG GAC AAC TTC GCC TAT<br>CCG | This study       |

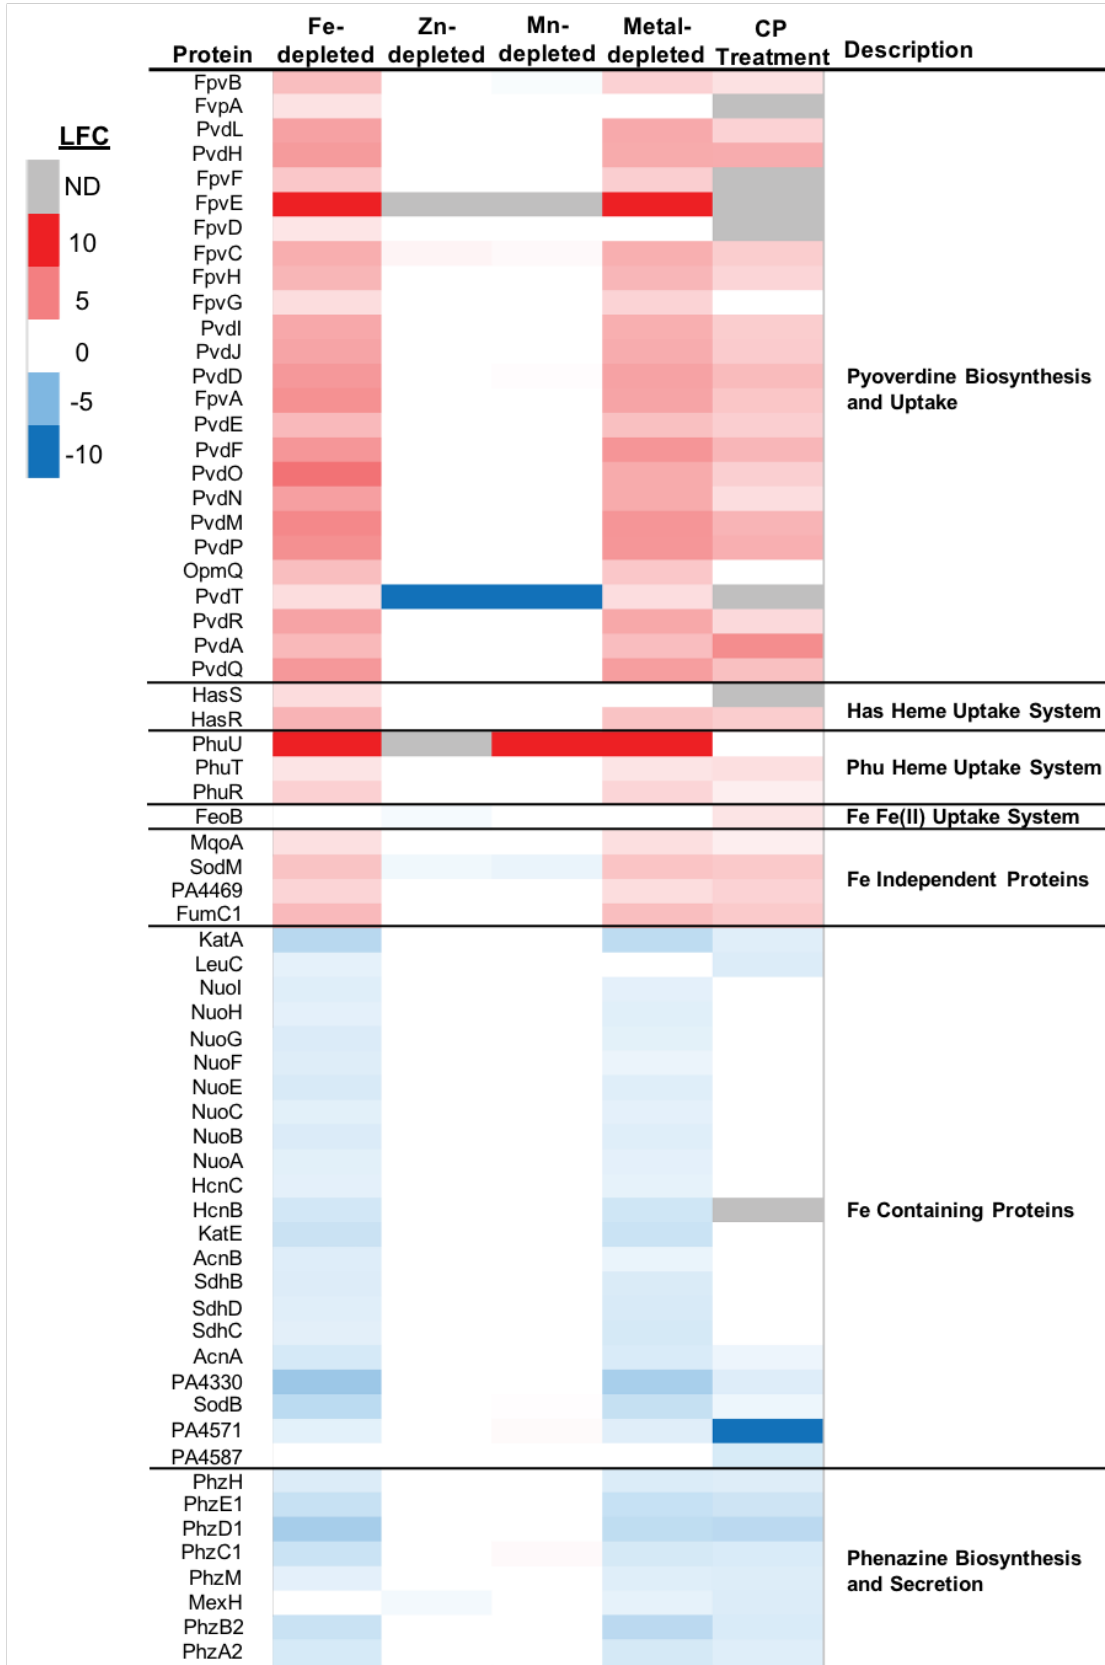

29 **Figure S1. Heatmap of Fe-regulated proteins.** The log<sub>2</sub>-fold change (LFC) is shown for all  
30 significantly (p<0.05) changed proteins. Protein expression was compared to the metal-replete  
31 CDM control. n=5  
32

33

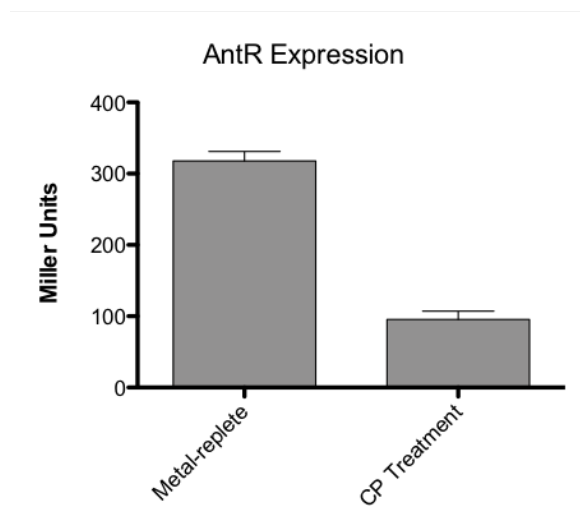

34

35 **Figure S2. AntR expression is repressed by CP in both CDM and Tris:TSB. PA14/PantR-**  
36 **'lacZ-SD** was grown in meal-replete CDM in the presence or absence of 10  $\mu$ M CP. AntR  
37 expression was determined by measuring  $\beta$ -galactosidase activity. Significance was determined  
38 by Students Two-Tailed T-Test, \* $p < 1.6 \times 10^{-6}$ ,  $n = 5$ .

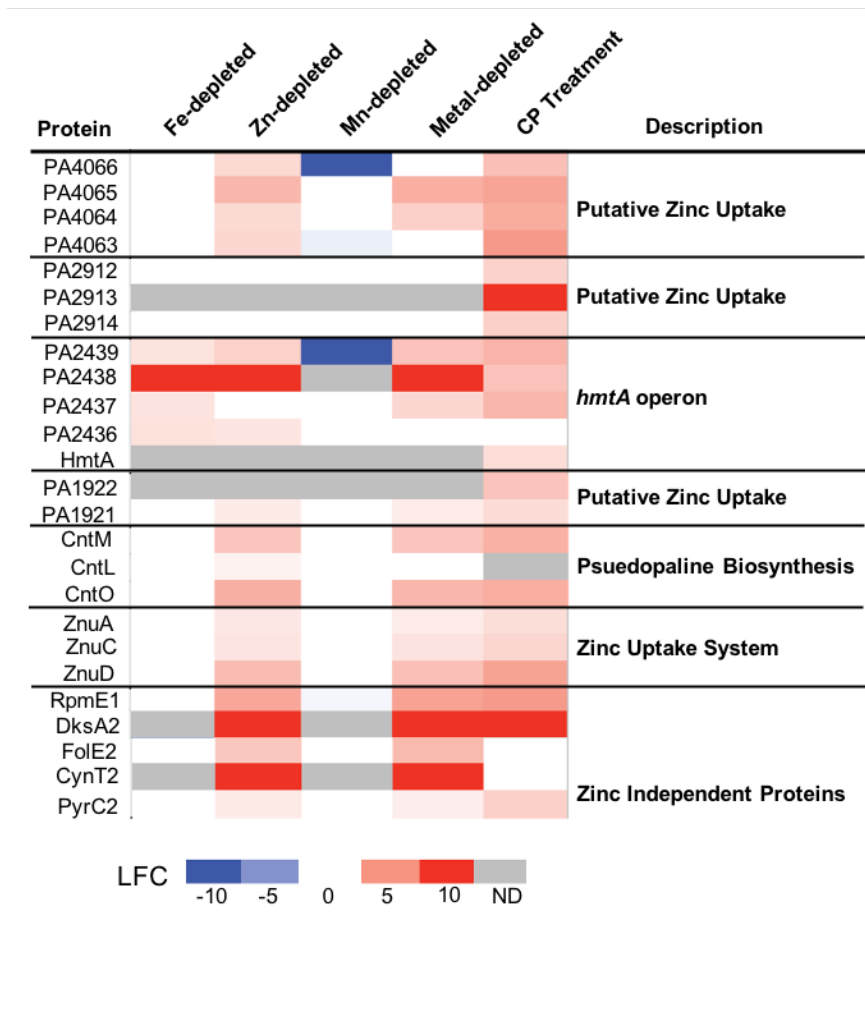

39

40 **Figure S3. Heatmap of the Zn-starvation response.** The protein expression was compared to  
 41 the metal-replete CDM control. The log<sub>2</sub>-fold change (LFC) is shown for all significantly (p<0.05)  
 42 changed proteins. n=5



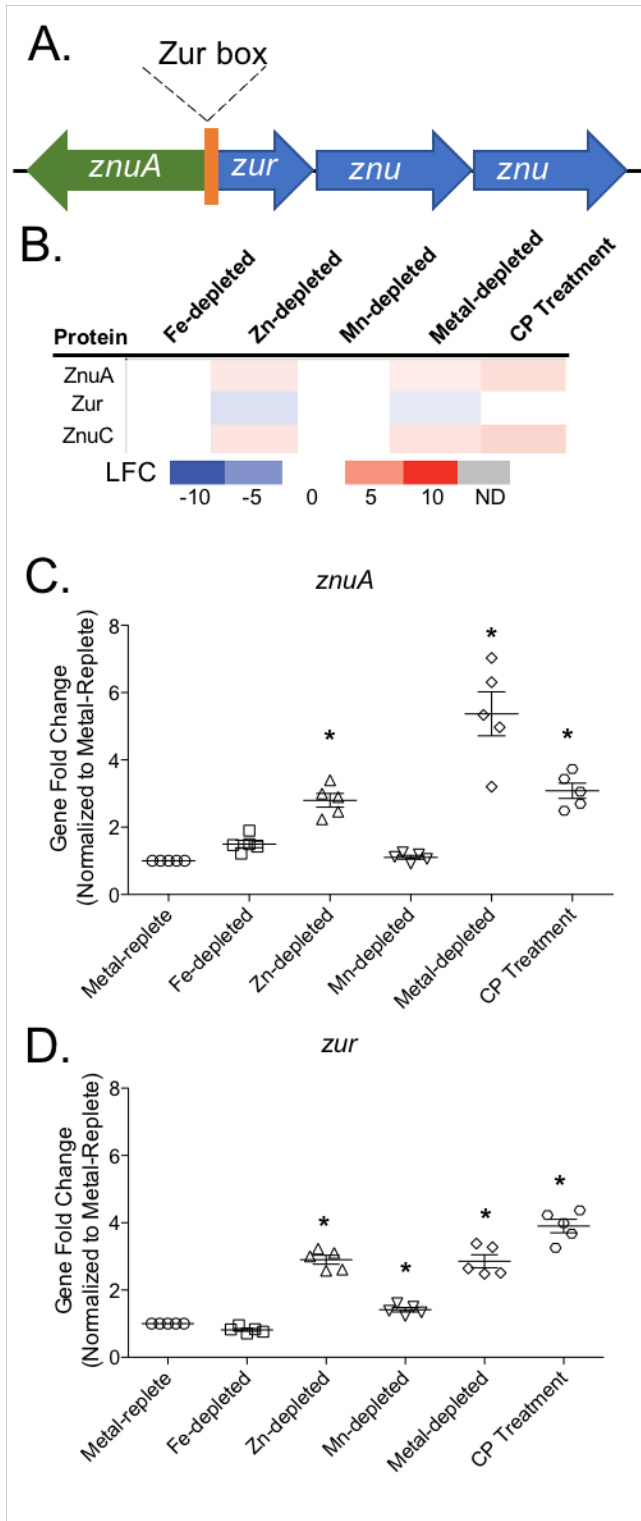

43

44 **Figure S4. Zur is post-transcriptionally repressed during Fe starvation.** A. Genetic  
 45 organization of *znuA* and the *zur-znuCB* operon. *znuA* is transcribed in the opposite direction of

46 the *zur-znuCB* operon and shares a 70-bp intergenic region containing a Zur box. 1" = 1 mbp **B.**  
47 Protein expression of ZnuA, Zur, and ZnuC. The protein expression was compared to the metal-  
48 replete control. The log<sub>2</sub>-fold change (LFC) is shown for all significantly (p<0.05) changed  
49 proteins. Gene expression of *zur* (**C.**) and *znuA* (**D.**) was measured by RT-PCR and compared  
50 to the metal-replete CDM control. Significance was determined by one-way ANOVA with  
51 Dunnet's multiple comparisons test. \*p<0.05, n=5 for all experiments shown.

A.

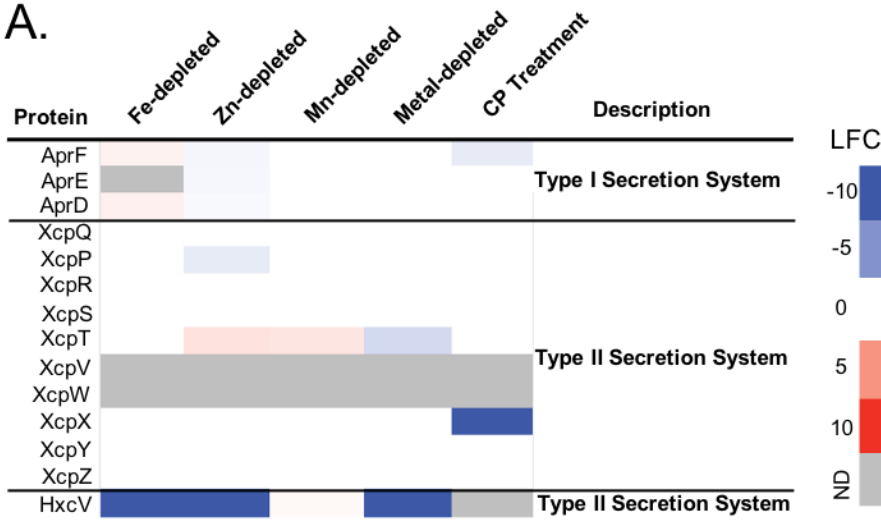

B.

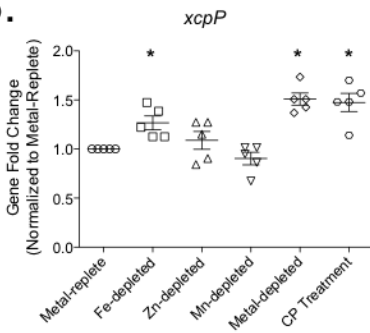

C.

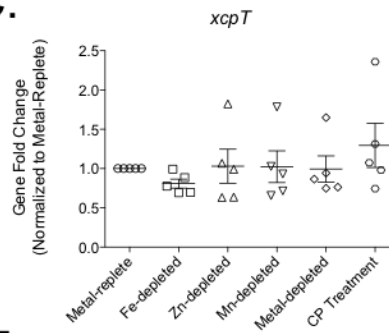

D.

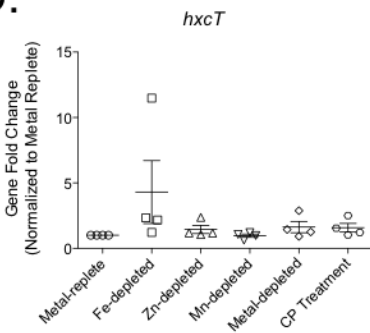

E.

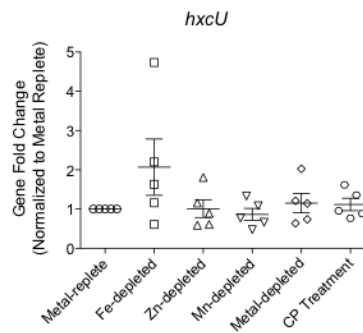

F.

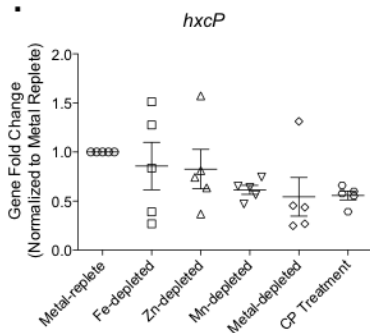

G.

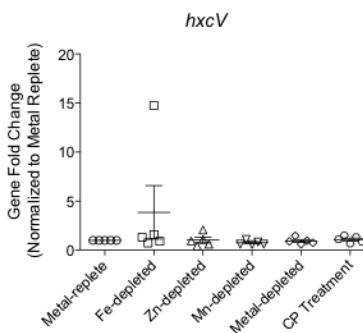

53 **Figure S5. T2SS and T1SS expression is not strongly regulated by Fe, Zn, or Mn. A.**

54 Protein expression of the Apr, Xcp, and Hxc secretion systems. The protein expression was

55 compared to the metal-replete CDM condition. The log<sub>2</sub>-fold change (LFC) is shown for all

56 significantly (p<0.05) changed proteins. Gene expression of *xcpP* (**B.**), *xcpT* (**C.**), *hxcT* (**D.**),

57 *hxcU* (**E.**), *hxcP* (**F.**) and *hxcV* (**G.**) was measured by RT-PCR and expression was compared to

58 the metal-replete CDM control. Significance was determined using a one-way ANOVA with

59 Dunnett's multiple comparison. \*p<0.05, n=5

60

61 **Quantitative label-free proteomics.** Two independent proteomics experiments were  
62 performed each with five biological replicates. The media for both experiments was prepared as  
63 described above as a single batch, inoculated with the same five overnight cultures, and  
64 samples were collected for both experiments at the same time to limit variability. For the first  
65 experiment, PA14 was grown in CDM with and without 10  $\mu$ M CP. For the second experiment,  
66 PA14 was grown in CDM, Fe-depleted, Mn-depleted, Zn-depleted, metal-depleted CDM.  
67 Quantitative label-free proteomics was performed similar as previously described with  
68 modification(3-5). Cells were harvested by centrifugation and washed in phosphate-buffered  
69 saline prior to lysis in 4% sodium deoxycholate. Lysates were washed, reduced, alkylated, and  
70 trypsinolyzed on a filter. Tryptic peptides were separated using a nanoACQUITY UPLC  
71 analytical column (BEH130 C18, 1.7  $\mu$ m, 75  $\mu$ m x 200 mm; Waters ) over a 165-min linear  
72 acetonitrile gradient (3 to 40%) with 0.1% formic acid on a Waters nanoAcquity UPLC system  
73 and analyzed on a coupled Thermo Scientific Orbitrap Fusion Lumos Tribrid mass  
74 spectrometer. Full scans were acquired at a resolution of 240,000, and precursors were  
75 selected for fragmentation by collision-induced dissociation (normalized collision energy at 35%)  
76 for a maximum 3 second cycle. Tandem mass spectra were searched against reference protein  
77 sequences of the *Pseudomonas aeruginosa* PA14 genome database (6) using the Sequest-HT  
78 and MS Amanda algorithms with a maximum precursor mass error tolerance of 10ppm (7, 8).  
79 Carbamidomethylation of cysteine and deamidation of asparagine and glutamine were treated  
80 as static and dynamic modifications, respectively. Resulting hits were validated at a maximum  
81 false-discovery rate (FDR) of 0.01 using a semi-supervised machine learning algorithm  
82 Percolator (9) Label-free quantifications were performed using Minora, an aligned accurate  
83 mass and retention time (AMRT) cluster quantification algorithm (Thermo Scientific). Protein  
84 abundance ratios between the CP-treated or metal-depleted cultures and the metal-replete  
85 cultures were measured by comparing the MS1 peak volumes of peptide ions, whose identities  
86 were confirmed by MS2 sequencing as described above. The thresholds for inclusion were as  
87 follows: significance ( $p < 0.05$ ) and expression (1  $\log_2$  fold change, LFC) equivalent to a 2-fold  
88 change. Gene function and pathway analysis was conducted using information from the  
89 *Pseudomonas* genome database (6) and the *Pseudomonas* metabolome database (10), and  
90 the STRING database (11).

91

## 92 Supplementary References

- 93 1. Cenciarini C, Courtois S, Raoult D, La Scola B. 2008. Influence of long time storage in  
94 mineral water on RNA stability of *Pseudomonas aeruginosa* and *Escherichia coli* after  
95 heat inactivation. *PLoS One* 3:e3443.
- 96 2. Nelson CE, Huang W, Brewer LK, Nguyen AT, Kane MA, Wilks A, Oglesby-Sherrouse  
97 AG. 2019. Proteomic Analysis of the *Pseudomonas aeruginosa* Iron Starvation  
98 Response Reveals PrrF Small Regulatory RNA-Dependent Iron Regulation of Twitching  
99 Motility, Amino Acid Metabolism, and Zinc Homeostasis Proteins. *J Bacteriol* 201.
- 100 3. Brewer LK, Huang W, Hackert BJ, Kane MA, Oglesby AG. 2020. Static Growth  
101 Promotes PrrF and 2-Alkyl-4(1H)-Quinolone Regulation of Type VI Secretion Protein  
102 Expression in *Pseudomonas aeruginosa*. *J Bacteriol* 202.
- 103 4. Defnet AE, Huang W, Polischak S, Yadav SK, Kane MA, Shapiro P, Deshpande DA.  
104 2019. Effects of ATP-competitive and function-selective ERK inhibitors on airway smooth  
105 muscle cell proliferation. *FASEB J* 33:10833-10843.
- 106 5. Kim D, Chen R, Sheu M, Kim N, Kim S, Islam N, Wier EM, Wang G, Li A, Park A, Son  
107 W, Evans B, Yu V, Prizmic VP, Oh E, Wang Z, Yu J, Huang W, Archer NK, Hu Z,  
108 Clemetson N, Nelson AM, Chien A, Okoye GA, Miller LS, Ghiaur G, Kang S, Jones JW,  
109 Kane MA, Garza LA. 2019. Noncoding dsRNA induces retinoic acid synthesis to  
110 stimulate hair follicle regeneration via TLR3. *Nat Commun* 10:2811.
- 111 6. Winsor GL, Griffiths EJ, Lo R, Dhillon BK, Shay JA, Brinkman FS. 2016. Enhanced  
112 annotations and features for comparing thousands of *Pseudomonas* genomes in the  
113 *Pseudomonas* genome database. *Nucleic Acids Res* 44:D646-53.
- 114 7. Eng JK, Fischer B, Grossmann J, Maccoss MJ. 2008. A fast SEQUEST cross correlation  
115 algorithm. *J Proteome Res* 7:4598-602.
- 116 8. Dorfer V, Pichler P, Stranzl T, Stadlmann J, Taus T, Winkler S, Mechtler K. 2014. MS  
117 Amanda, a universal identification algorithm optimized for high accuracy tandem mass  
118 spectra. *J Proteome Res* 13:3679-84.
- 119 9. Käll L, Canterbury JD, Weston J, Noble WS, MacCoss MJ. 2007. Semi-supervised  
120 learning for peptide identification from shotgun proteomics datasets. *Nat Methods* 4:923-  
121 5.
- 122 10. Huang W, Brewer LK, Jones JW, Nguyen AT, Marcu A, Wishart DS, Oglesby-Sherrouse  
123 AG, Kane MA, Wilks A. 2018. PAMDB: a comprehensive *Pseudomonas aeruginosa*  
124 metabolome database. *Nucleic Acids Res* 46:D575-d580.
- 125 11. Szklarczyk D, Morris JH, Cook H, Kuhn M, Wyder S, Simonovic M, Santos A, Doncheva  
126 NT, Roth A, Bork P, Jensen LJ, von Mering C. 2017. The STRING database in 2017:  
127 quality-controlled protein-protein association networks, made broadly accessible. *Nucleic  
128 Acids Res* 45:D362-d368.  
129
